# Supplementary material for: A Facile One-Pot Approach to the Fabrication of Nanocellulose–Titanium Dioxide Nanocomposites with Promising Photocatalytic and Antimicrobial Activity
Source: MDPI journal article supplement (doi:10.3390/ma15165789), 2022-08-22
Supplement: s1 [file s1]

**A facile one-pot approach to the fabrication of Nanocellulose/Titanium Dioxide nanocomposites with promising photocatalytic and antimicrobial activity**

**Roberta G. Toro<sup>1,\*</sup>, Abeer M. Adel<sup>2</sup>, Tilde de Caro<sup>1</sup>, Bruno Brunetti<sup>3</sup>, Mona T. Al-Shemy<sup>2</sup>, Daniela Caschera<sup>1</sup>**

<sup>1</sup> Institute for the Study of Nanostructured Materials, ISMN-CNR, Via Salaria km 29,300 Monterotondo, Rome, Italy

<sup>2</sup> National Research Centre, Cellulose and Paper Department, 33El-Bohouth St. (Former El-Tahrir St.), Dokki, P.O. 12622, Giza, Egypt

<sup>3</sup> Institute for the Study of Nanostructured Materials, ISMN-CNR, c/o Dipartimento di Chimica, Università degli Studi di Roma "La Sapienza", Piazzale Aldo Moro 5, Rome, Italy

\*Corresponding Author

*Roberta G. Toro*

e-mail: robertagrazia.toro@cnr.it

Phone: +390690672828

Orcid: <https://orcid.org/0000-0002-8720-4086>

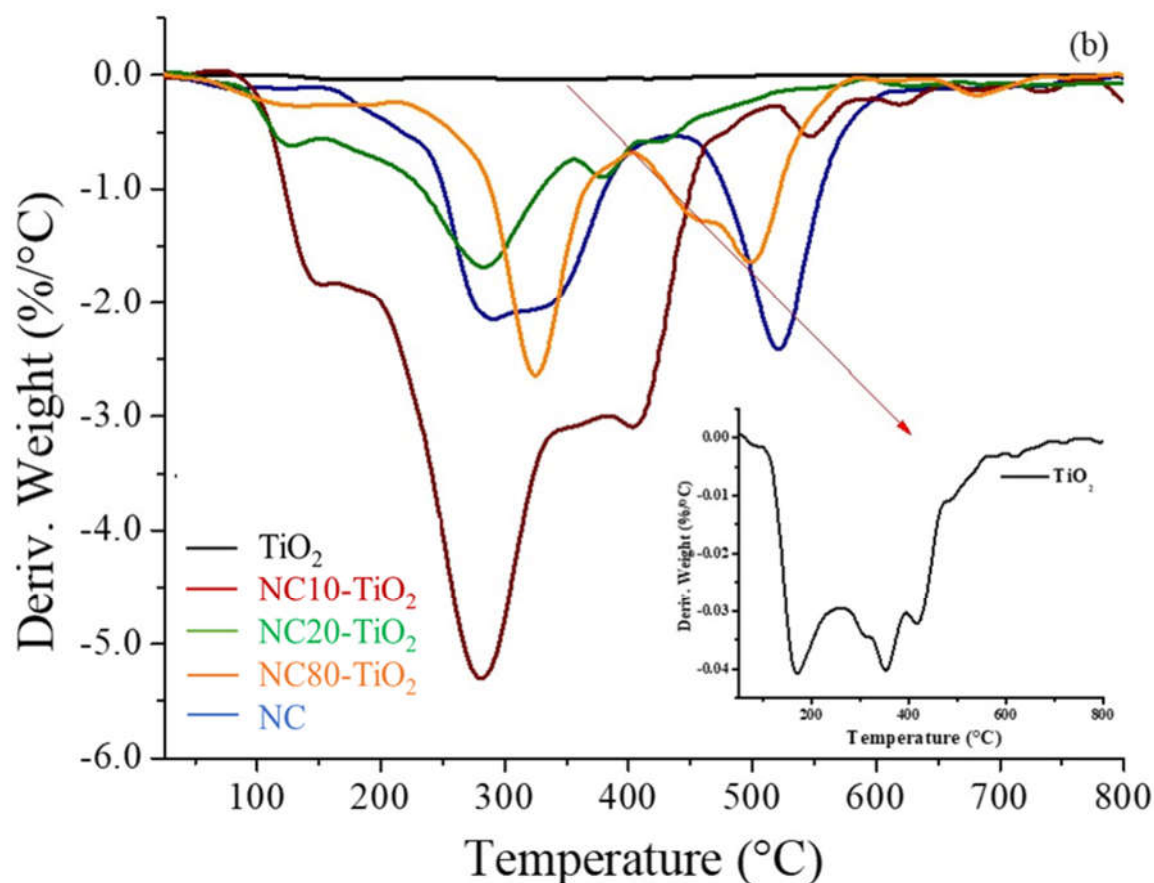

**Figure S1:** DTG analyses for (–) TiO<sub>2</sub>, (–) NC, (–) NC10-TiO<sub>2</sub>, (–) NC20-TiO<sub>2</sub>, and (–) NC80-TiO<sub>2</sub>.

| Sample                | Step | T <sub>m</sub><br>(°C) | W <sub>tloss</sub><br>(%) | RC <sub>650</sub><br>(%) | A<br>(s <sup>-1</sup> ) | E <sub>a</sub><br>(kJ mol <sup>-1</sup> ) | ΔH<br>(kJ mol <sup>-1</sup> ) | ΔS<br>(JK <sup>-1</sup> mol <sup>-1</sup> ) | ΔG <sub>a</sub><br>(kJ mol <sup>-1</sup> ) | r <sup>2</sup> |
|-----------------------|------|------------------------|---------------------------|--------------------------|-------------------------|-------------------------------------------|-------------------------------|---------------------------------------------|--------------------------------------------|----------------|
| TiO <sub>2</sub>      | I    | 170                    | 2.22                      | 93.45                    | 96.89×10 <sup>5</sup>   | 73.65                                     | 69.97                         | -0.115                                      | 120.68                                     | 0.93           |
|                       | II   | 354                    | 4.34                      |                          | 117.22                  | <u>47.89</u>                              | <u>42.68</u>                  | <u>-0.212</u>                               | <u>175.31</u>                              | 0.93           |
|                       |      |                        |                           |                          |                         | Σ121.54                                   | Σ112.64                       | Σ-0.326                                     | Σ295.99                                    |                |
| NC10-TiO <sub>2</sub> | I    | 281                    | 16.8                      | 83.49                    | 5.98                    | <u>29.00</u>                              | <u>24.40</u>                  | <u>-0.235</u>                               | <u>154.73</u>                              | 0.98           |
|                       |      |                        |                           |                          |                         | Σ29.00                                    | Σ24.40                        | Σ-0.235                                     | Σ154.73                                    |                |
| N20-TiO <sub>2</sub>  | I    | 283                    | 23.4                      | 76.19                    | 3.36                    | <u>26.05</u>                              | <u>21.43</u>                  | <u>-0.240</u>                               | <u>154.91</u>                              | 0.95           |
|                       |      |                        |                           |                          |                         | Σ26.05                                    | Σ21.43                        | Σ-0.240                                     | Σ154.91                                    |                |
| NC80-TiO <sub>2</sub> | I    | 325                    | 39.3                      | 21.28                    | 82.57×10 <sup>4</sup>   | 84.25                                     | 79.28                         | -0.138                                      | 161.48                                     | 0.98           |
|                       | II   | 499                    | 32.7                      |                          | 40.09×10 <sup>6</sup>   | <u>130.68</u>                             | <u>124.26</u>                 | <u>-0.107</u>                               | <u>207.09</u>                              | 0.98           |
|                       |      |                        |                           |                          |                         | Σ214.93                                   | Σ203.54                       | Σ-0.245                                     | Σ368.58                                    |                |
| NC                    | I    | 290                    | 50.93                     | 9.67                     | 18.58×10 <sup>2</sup>   | 54.84                                     | 50.16                         | -0.188                                      | 155.81                                     | 0.99           |
|                       | II   | 522                    | 33.77                     |                          | 1.48×10 <sup>8</sup>    | <u>146.12</u>                             | <u>139.51</u>                 | <u>-0.097</u>                               | <u>216.39</u>                              | 0.98           |
|                       |      |                        |                           |                          |                         | Σ200.96                                   | Σ189.67                       | Σ-0.284                                     | Σ372.19                                    |                |

**Table S1:** TG, DTG, kinetic and thermodynamic data from the thermal decomposition steps of prepared samples

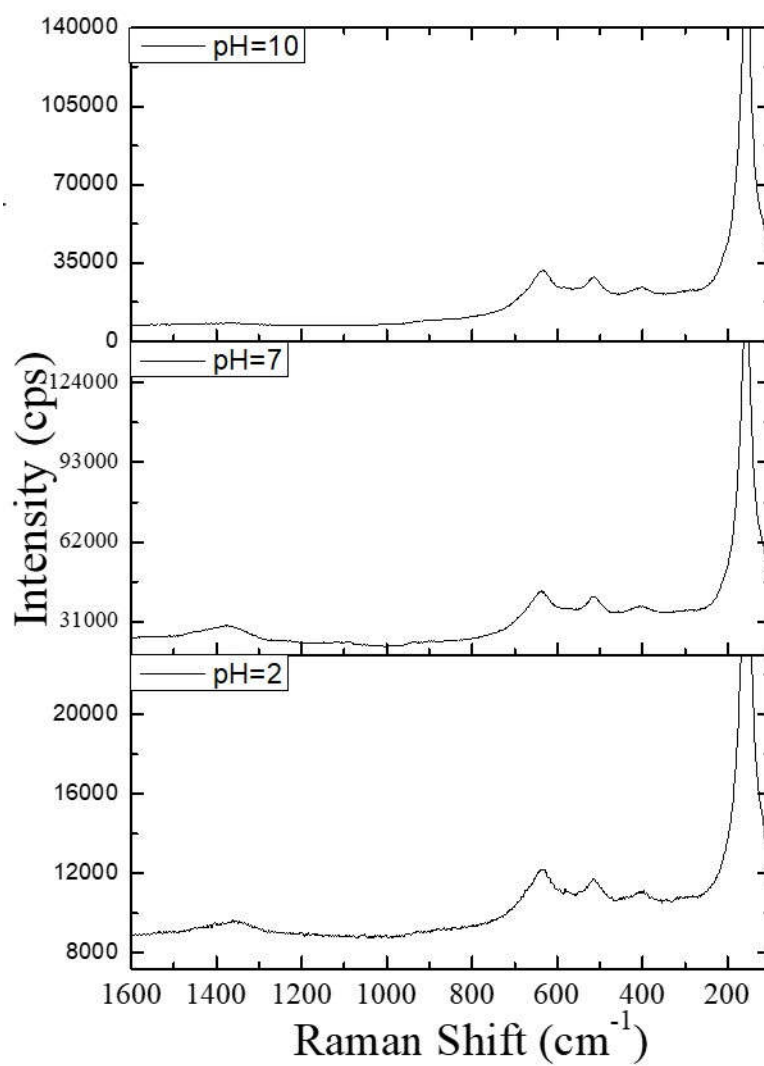

**Figure S2:** Raman spectra of NC20-TiO<sub>2</sub> sample after photocatalytic tests at different pH

| Sample                |                                    | Inhibition zone diameter (mm/Sample) |                              |                         |                               |                         |
|-----------------------|------------------------------------|--------------------------------------|------------------------------|-------------------------|-------------------------------|-------------------------|
|                       |                                    | Bacterial species                    |                              |                         |                               | Fungi                   |
|                       |                                    | G <sup>+</sup>                       |                              | G <sup>-</sup>          |                               | <i>Candida albicans</i> |
|                       |                                    | <i>Bacillus subtilis</i>             | <i>Staphylococcus aureus</i> | <i>Escherichia coli</i> | <i>Pseudomonas aeruginosa</i> |                         |
| Standard              | Ampicillin Antibacterial agent     | 26                                   | 21                           | 25                      | 26                            | --                      |
|                       | Amphotericin B<br>Antifungal agent | --                                   | --                           | --                      | --                            | 21                      |
| TiO <sub>2</sub>      |                                    | 25                                   | 28                           | 30                      | 27                            | 10                      |
| NC20-TiO <sub>2</sub> |                                    | 23                                   | 25                           | 21                      | 24                            | 10                      |
| NC80-TiO <sub>2</sub> |                                    | 20                                   | 23                           | 22                      | 21                            | 9                       |

**Table S2:** Diameter size of the inhibition zone for TiO<sub>2</sub>, NC20-TiO<sub>2</sub>, and NC80-TiO<sub>2</sub> nanocomposites through different bacteria.
